# Supplementary material
Source: HighWire-hosted journal article supplement (http://dmd.aspetjournals.org/highwire/filestream/66563/field_highwire_adjunct_files/0/Supplemental_65763.pdf)
Supplement: Supplemental_65763.pdf [file Supplemental_65763.pdf]

***In vitro* metabolism of montelukast by Cytochrome P450s (CYPs) and UDP-glucuronosyltransferases (UGTs)**

Josiane de Oliveira Cardoso, Regina Vincenzi Oliveira, Jessica Bo Li Lu, Zeruesenay Desta.

Department of Medicine, Division of Clinical Pharmacology, Indiana University School of Medicine, Indianapolis, Indiana, USA (J.O. C.; J. B. L.L. and Z. D.), And  
Department of Chemistry, Federal University of São Carlos, São Carlos, SP, Brazil (J.O. C. and R.V.O.).

## Supplemental Data

**Table S1.** Correlation of formation rates of montelukast 1,2 diol, 21(R)-OH montelukast, 21(S)-OH montelukast and 25-OH montelukast from montelukast (1  $\mu$ M) metabolism with the activities of different P450 isoforms and total P450 contents in 14 HLMs

|                      | Montelukast<br>1,2 diol |          | 21(R)-OH<br>montelukast |          | 21(S)-OH<br>montelukast |          | 25-OH<br>montelukast |          |
|----------------------|-------------------------|----------|-------------------------|----------|-------------------------|----------|----------------------|----------|
|                      | <i>r</i>                | <i>p</i> | <i>r</i>                | <i>p</i> | <i>r</i>                | <i>p</i> | <i>r</i>             | <i>p</i> |
| <b>P450s</b>         |                         |          |                         |          |                         |          |                      |          |
| <b>Total P450</b>    | 0.47                    | 0.091    | 0.46                    | 0.094    | 0.46                    | 0.094    | 0.65                 | 0.012    |
| <b>Cytochrome c</b>  | 0.02                    | 0.935    | 0.18                    | 0.542    | 0.15                    | 0.604    | 0.06                 | 0.852    |
| <b>Cytochrome b5</b> | -0.09                   | 0.770    | -0.23                   | 0.430    | -0.24                   | 0.403    | -0.28                | 0.336    |
| <b>CYP1A2</b>        | 0.21                    | 0.473    | -0.01                   | 0.970    | -0.08                   | 0.794    | 0.15                 | 0.604    |
| <b>CYP2A6</b>        | 0.30                    | 0.302    | 0.84                    | 0.0002   | 0.78                    | 0.001    | 0.68                 | 0.008    |
| <b>CYP2B6</b>        | 0.48                    | 0.080    | 0.61                    | 0.020    | 0.59                    | 0.027    | 0.65                 | 0.012    |
| <b>CYP2C8</b>        | 0.63                    | 0.016    | 0.33                    | 0.246    | 0.33                    | 0.253    | 0.60                 | 0.025    |
| <b>CYP2C9</b>        | 0.37                    | 0.190    | 0.17                    | 0.562    | 0.15                    | 0.609    | 0.30                 | 0.291    |
| <b>CYP2C19</b>       | 0.82                    | 0.0004   | 0.84                    | 0.0002   | 0.84                    | 0.0001   | 0.94                 | <0.0001  |
| <b>CYP2D6</b>        | 0.34                    | 0.239    | 0.28                    | 0.337    | 0.35                    | 0.220    | 0.32                 | 0.259    |
| <b>CYP2E1</b>        | 0.50                    | 0.066    | 0.05                    | 0.863    | 0.01                    | 0.976    | 0.27                 | 0.357    |
| <b>CYP3A4</b>        | 0.68                    | 0.007    | 0.85                    | 0.0001   | 0.81                    | 0.0004   | 0.78                 | 0.001    |
| <b>CYP4A11</b>       | 0.81                    | 0.0004   | 0.29                    | 0.323    | 0.33                    | 0.253    | 0.61                 | 0.020    |
| <b>FMO</b>           | 0.12                    | 0.689    | -0.07                   | 0.815    | -0.04                   | 0.886    | 0.06                 | 0.839    |

Data were analyzed using the nonparametric correlation test (Spearman *r*). The activity of each isoform was determined using the respective specific substrate probe reaction as indicated by the supplier (see Materials and Methods section).  $p < 0.05$  is considered statistically significant.

Figure S1

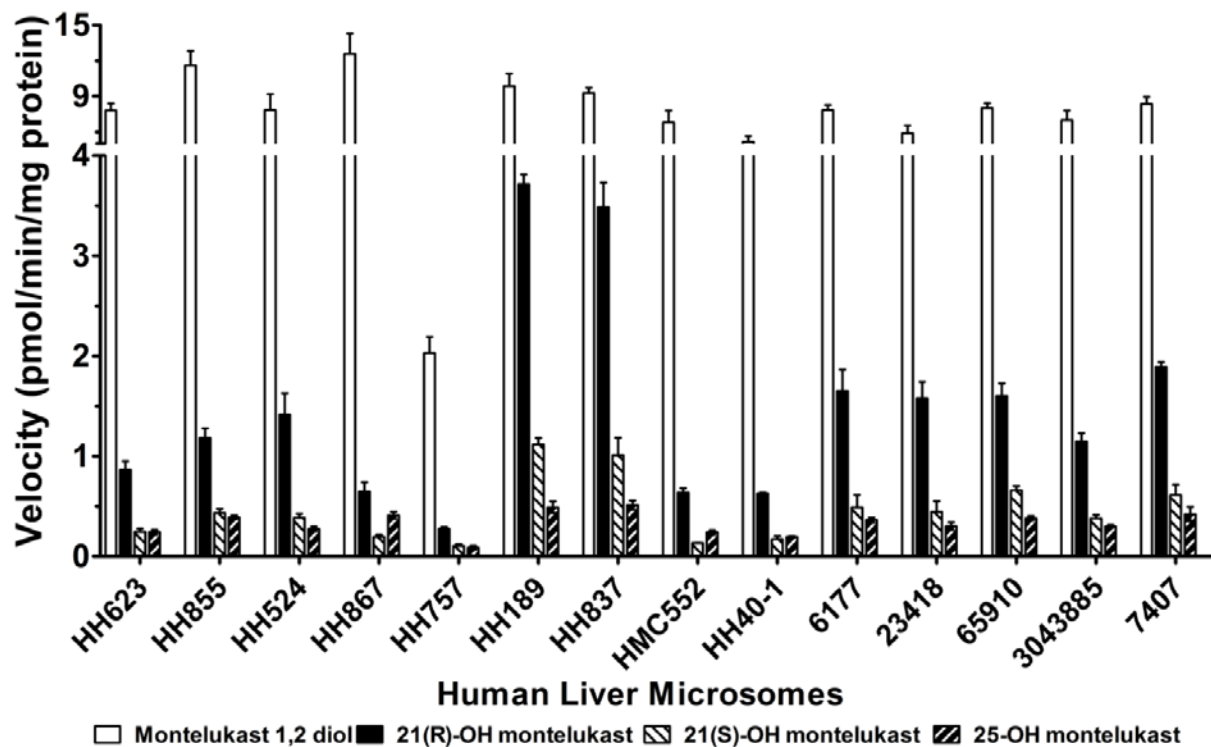

**Figure S1.** The formation rate of montelukast 1,2 diol, 21(R)-OH montelukast, 21(S)-OH montelukast and 25-OH montelukast in a panel of 14 characterized HLMs. Montelukast (1  $\mu$ M) was incubated in HLMs (0.25 mg/mL) with a NADPH-generating system (final volume, 250  $\mu$ L) at 37  $^{\circ}$ C for 30 min.

Figure S2

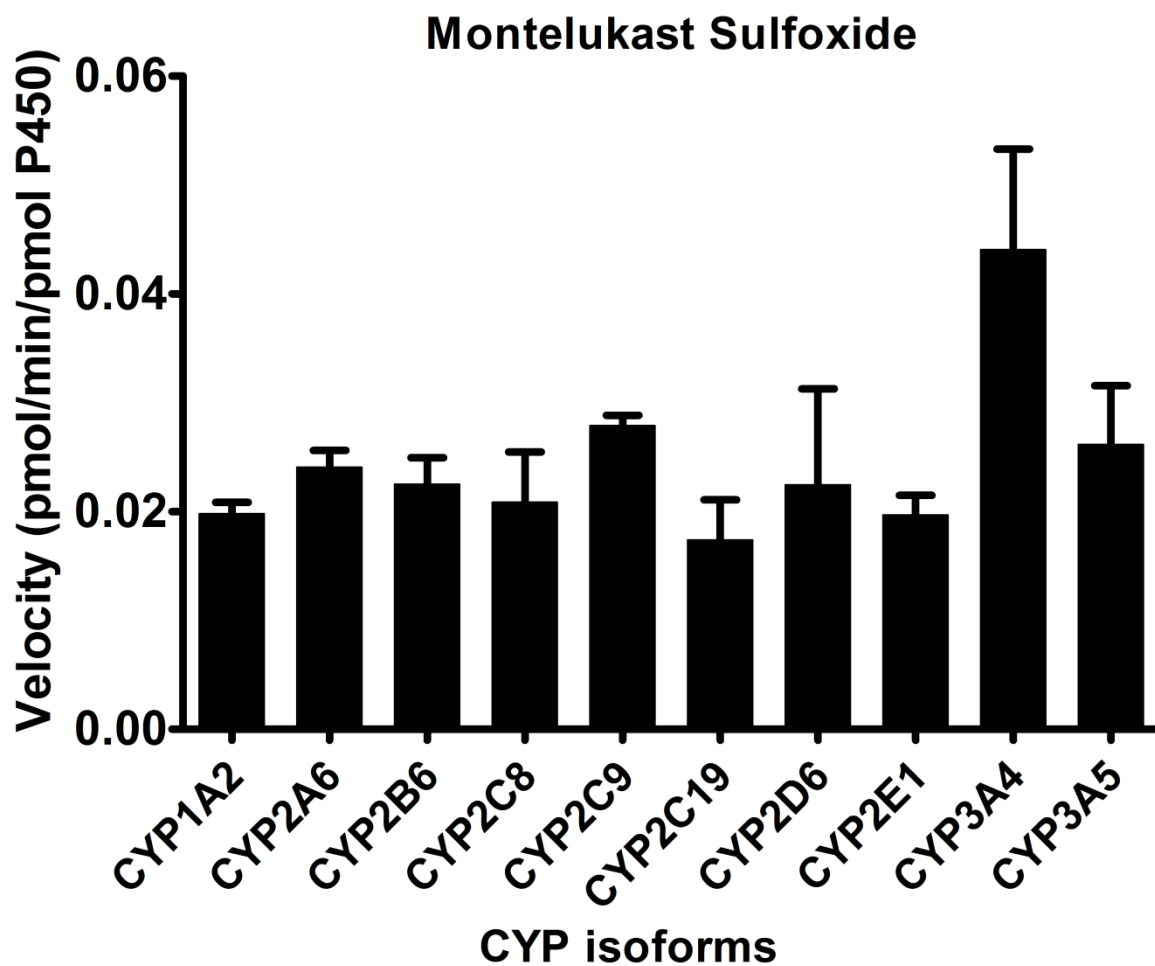

**Figure S2.** Formation rate of montelukast sulfoxide in a panel of 10 recombinant human CYP P450s. 20 pmol of recombinant P450 was incubated with montelukast (1  $\mu$ M) and NADPH-generating system (final volume, 250  $\mu$ L) at 37  $^{\circ}$ C for 30 min. The recombinant human CYPs used were co-expressed without cytochrome  $b_5$ .

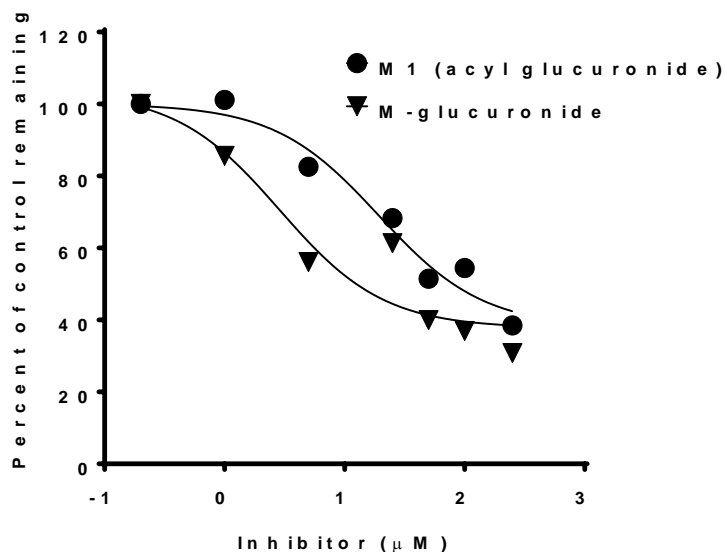

**Figure S3.** Inhibition of montelukast glucuronidation to montelukast acyl-β-D glucuronide and M-glucuronide by gemfibrozil in HLM. Montelukast ( $1\mu\text{M}$ ) was incubated with HLMs ( $0.25\text{ mg/mL}$ ) and UDPGA ( $5\text{mM}$ ) for 30 min at  $37\text{ }^{\circ}\text{C}$  in the absence (vehicle control) and in the presence increasing concentration of gemfibrozil ( $0.5$  to  $250\text{ }\mu\text{M}$ ). Percent activity remaining versus the control activity was calculated. Nonlinear regression was implemented to fit the data to the  $\log(\text{gemfibrozil})$  vs. percent activity remaining. The absolute and relative  $\text{IC}_{50}$ s were similar ( $83.4\mu\text{M}$  and  $37.6\mu\text{M}$  for the inhibition of acyl-glucuronide and M-glucuronide respectively). Each data represents average of duplicate incubations.
